# Supplementary material for: Natural Selection Canalizes Expression Variation of Environmentally Induced Plasticity-Enabling Genes
Source: PubMed Central journal article supplement — Mol Biol Evol. 2014 Aug 25;31(11):3002–15. doi: 10.1093/molbev/msu241 (PMC4209136; doi:10.1093/molbev/msu241), 2014-08-25
Supplement: supp_msu241_Supporting_Information_MBE_minor_revision.pdf [file supp_msu241_Supporting_Information_MBE_minor_revision.pdf]

## **SUPPLEMENTARY INFORMATION**

## **Page number**

### Supplementary tables

|                                                                           |     |
|---------------------------------------------------------------------------|-----|
| <b>S1.</b> Index of samples for transcriptome sequencing                  | 2-3 |
| <b>S2.</b> <i>Fundulus heteroclitus</i> transcriptome assembly statistics | 4   |
| <b>S3.</b> Primer sets used for qPCR studies                              | 5   |

### Supplementary figures

|                                                |   |
|------------------------------------------------|---|
| <b>S1.</b> Venn diagram of linear model output | 6 |
| <b>S2.</b> Network analysis                    | 7 |
| <b>S3.</b> Transcriptome assembly              | 8 |
| <b>S4.</b> Validation of microarray results    | 9 |

**Table S1. Index of samples for transcriptome sequencing**

---

| <b>Treatment</b>                | <b>Tissue</b>           |
|---------------------------------|-------------------------|
| Freshwater Male                 | Kidney<br>Liver<br>Gill |
| Freshwater Female               | Kidney<br>Liver<br>Gill |
| Seawater Male                   | Kidney<br>Liver<br>Gill |
| Seawater Female                 | Kidney<br>Liver<br>Gill |
| 10% Seawater Male               | Kidney<br>Liver<br>Gill |
| 10% Seawater Female             | Kidney<br>Liver<br>Gill |
| Freshwater to seawater (30 min) | Kidney<br>Liver<br>Gill |
| Freshwater to seawater (1 hr)   | Kidney<br>Liver<br>Gill |
| Freshwater to seawater (3 hr)   | Kidney<br>Liver<br>Gill |
| Seawater to freshwater (30 min) | Kidney<br>Liver<br>Gill |
| Seawater to freshwater (1 hr)   | Kidney<br>Liver<br>Gill |
| Seawater to freshwater (3 hr)   | Kidney<br>Liver<br>Gill |
| Embryo (8 day)                  | ----                    |
| Embryo (14 day)                 | ----                    |
| *Arsenic (8000 µg/L)            | Gill<br>Liver           |
| *Arsenic (12,000 µg/L)          | Gill<br>Liver           |
| *Cadmium (500 µg/L)             | Gill<br>Liver           |

**Table S1. Continued**

|                                            |       |
|--------------------------------------------|-------|
| *Cadmium (5000 µg/L)                       | Gill  |
|                                            | Liver |
| *Lead (500 µg/L)                           | Gill  |
|                                            | Liver |
| *Lead (5000 µg/L)                          | Gill  |
|                                            | Liver |
| *Copper (4.8 µg/L)                         | Gill  |
|                                            | Liver |
| *Copper (480 µg/L)                         | Gill  |
|                                            | Liver |
| *Lead (500 µg/L) + Copper (4.8 µg/L)       | Liver |
| *Arsenic (12,000 µg/L) + Copper (480 µg/L) | Liver |
| *Cadmium (5000 µg/L) + Copper (480 µg/L)   | Liver |

---

\*Fish were exposed to metals for 24 h in seawater

**Table S2. *Fundulus heteroclitus* transcriptome assembly statistics**

---

**Input sequences**

|                                   |             |
|-----------------------------------|-------------|
| Number of sequence reads, raw     | 1,340,048   |
| Number of sequence reads, trimmed | 1,302,633   |
| Number of bases, raw              | 273,469,835 |
| Number of bases, trimmed          | 229,144,736 |

**Output Sequences**

|                      |            |
|----------------------|------------|
| Unique Contigs (all) | 38,673     |
| Total bases (bp)     | 18,682,616 |
| Coverage             | 9.8X       |
| Average size (bp)    | 483        |
| N50                  | 646        |

|                                |            |
|--------------------------------|------------|
| Unique Contigs (large, >500bp) | 11,873     |
| Total bases (bp)               | 11,287,711 |
| Average size (bp)              | 950        |
| N50                            | 1,028      |

|                                 |           |
|---------------------------------|-----------|
| Unique Contigs (major, >1000bp) | 4,113     |
| Total bases (bp)                | 5,879,893 |
| Average size (bp)               | 1,429     |
| N50                             | 1,426     |

|                |         |
|----------------|---------|
| Singleton ESTs | 169,915 |
|----------------|---------|

---

**Table S3. Quantitative PCR primer pairs**

| Contig | Gene       | Sense                    | Antisense                | Tm    |
|--------|------------|--------------------------|--------------------------|-------|
| 2378   | ATPIF1     | AGCCCTTACAAAGAGGTCAGTAGA | GAACGCCTACAAAGAGAGATTGAC | 60/61 |
| 8426   | ANGPTL4    | TGAACTGAGACTTCATTTTTCTCG | CCCAGAGAACTGGGTCTTTAACTA | 60/60 |
| 4632   | CH25H      | AACAATGAAGGAACAAAAAGAAGG | TGTACATGGGATTACACATTCTCC | 60/60 |
| 6109   | CLDN8      | CTTTTTATGTGCAAAATTGGTTGA | AACAAACAAATGTCACAAGCTGAT | 60/60 |
| 6683   | GSTO1      | AGGATTCGAAGCTGAGTTAAAAGA | AACATCTCAAGCCTCTCAAAGAAT | 60/60 |
| 35232  | TOMM40     | AGTTGACAAACTTATGCTGCTGAG | TACGTTGGAAGTAAACAGACTGGA | 60/60 |
| 23405  | Acetyl-CoA | TGTGGTGCATTAATTTCCAG     | GTTACGCAAAAGTACCGATGAAG  | 60/60 |

A. up-regulated

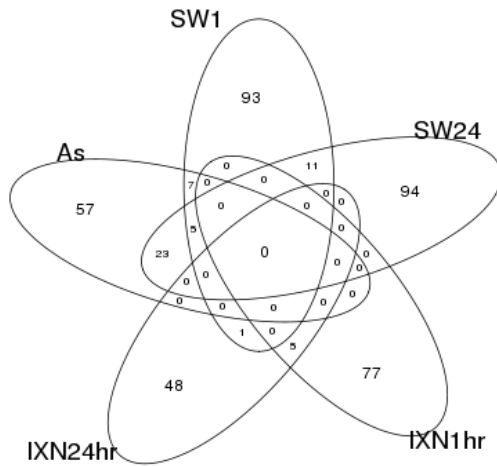

B. down-regulated

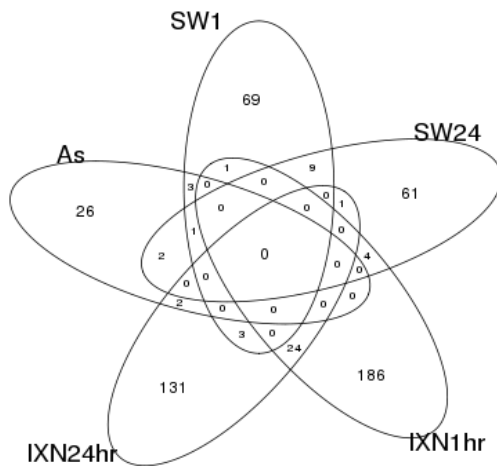

**Supplementary Figure S1.** Venn diagram of differentially expressed genes. Transcriptomic response of *F. heteroclitus* gills (n=4, independent male fish per treatment) to arsenic during seawater acclimation reveals salinity dependent, arsenic mediated gene expression. Quantile normalized log<sub>2</sub> expression values were analyzed using a simple two-factor linear model, implemented in R that included two categorical variables (presence of arsenic and time spent in seawater), as well as, interactions between levels of the two categorical variables. Probes with p value <0.05 and fold change  $\geq 2$  for at least one effect were deemed significantly affected by treatment. Numbers represent differentially (A) up-regulated and (B) down-regulated genes for the following treatments: arsenic (As), 1hr in seawater (SW1), 24hr in seawater (SW24), interactions between arsenic and SW1 (IXN1hr) and arsenic and SW24 (IXN24hr). Interaction effects are not predicted by simple addition of effects attributable to arsenic or seawater alone, and all were antagonistic (i.e., less than additive).

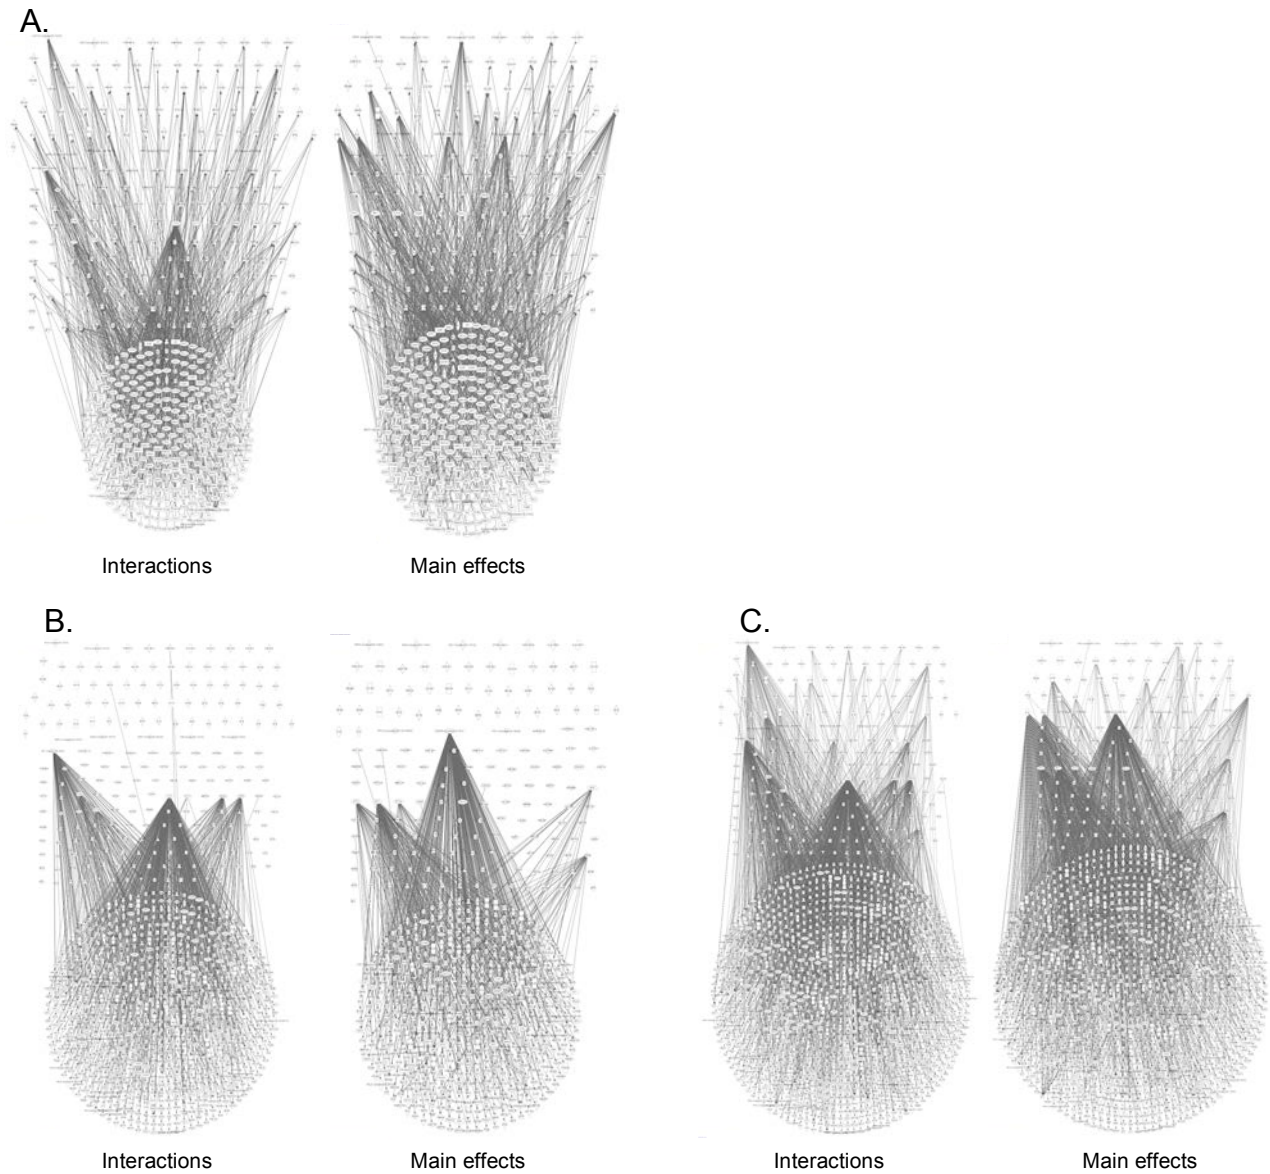

**Supplementary Figure S2.** Network analysis for (A) upstream direct, (B) downstream direct, and (C) downstream direct and indirect gene regulatory networks. Gene regulatory networks were constructed using Integrated Pathway Analysis software (IPA, Ingenuity Systems) between the uniquely interaction gene sets and the uniquely main effect gene sets, and their known trans-regulating molecules (circles). Relationships are indicated with lines and visual inspection suggests that the interaction gene sets form less complex networks with upstream trans-regulating molecules than main effects gene sets (A), but there are less differences in the complexity of networks formed by the interaction and main effects gene sets and their downstream targets (B, C) for which no statistical differences were observed.

A.

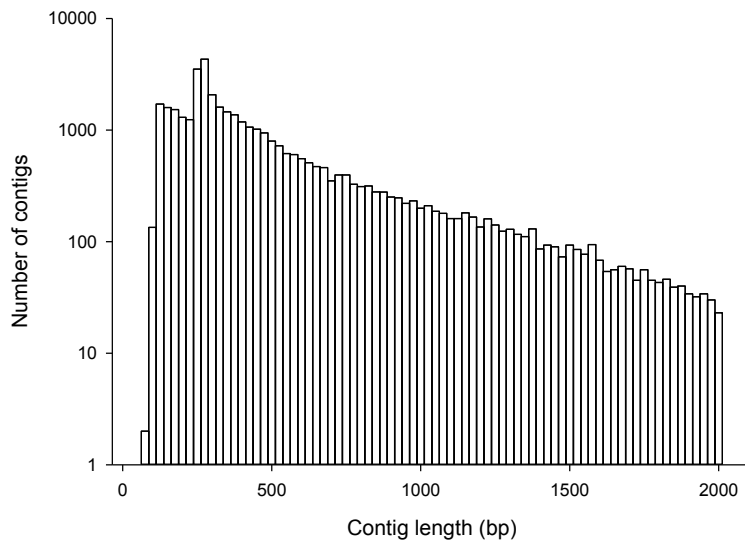

B.

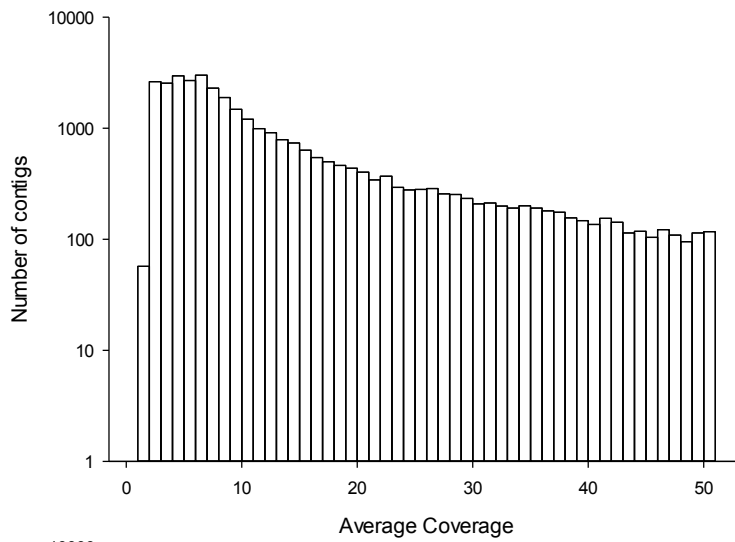

C.

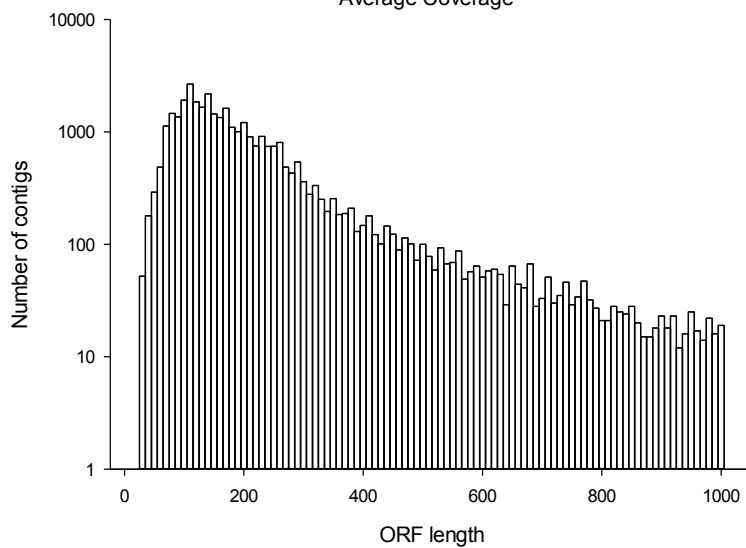

**Supplementary Figure S3.** Characteristics of assembled *Fundulus heteroclitus* contigs. A) Length and B) coverage and C) size of open reading frames (ORFs) of contigs. Note the logarithmic vertical axes. Summary statistics are provided in Table S2.



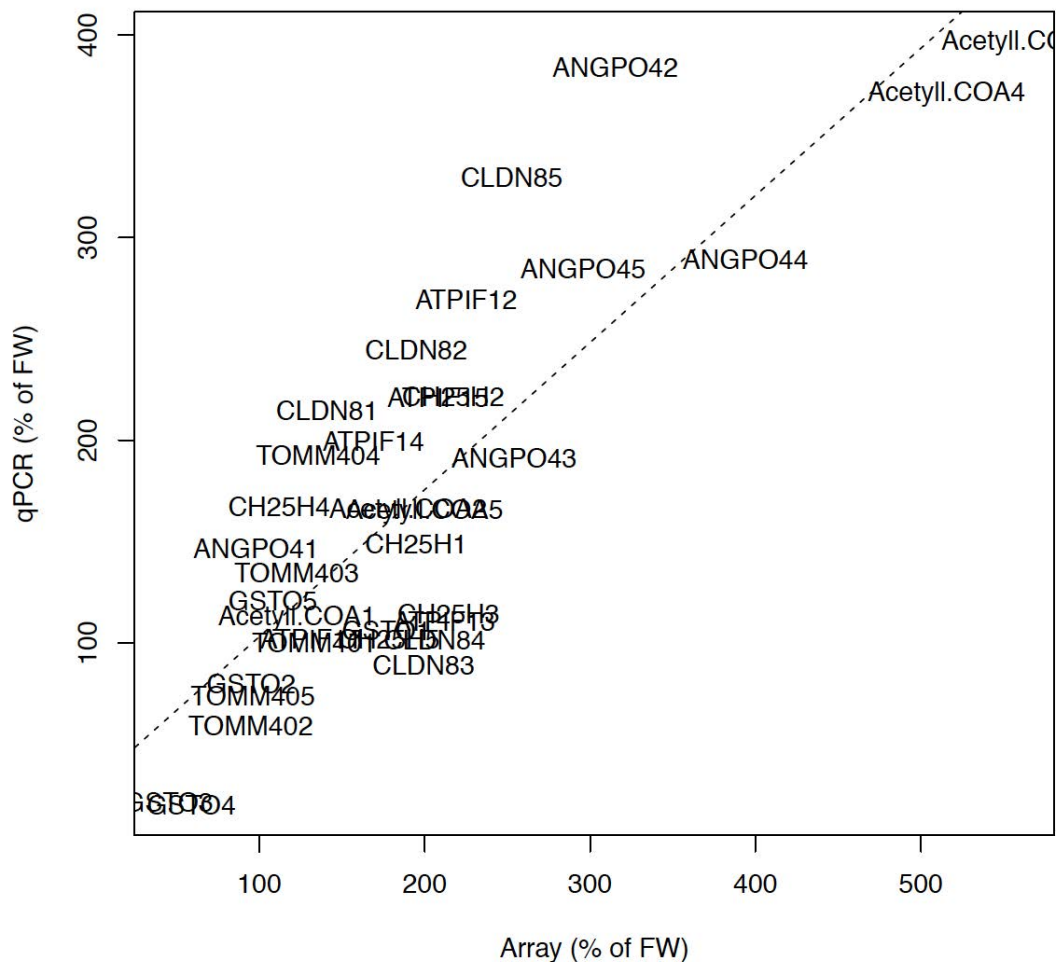

**Supplementary Figure S4.** Validation of microarray results. We independently validated microarray results in a separate set of experiments in which different fish (n=6 fish per treatment) were exposed to the same treatment conditions and gene expression of seven target genes assessed via qPCR. The seven genes, Acetyl COA, CLDN8, GSTO1, TOMM40, ANGPTL4, ATPIF1, CH25H, were selected because they were well annotated, well expressed and showed significant regulation in at least one treatment. For each gene, we examined the treatment means expressed as a percentage of the freshwater treatment in both the microarray and qPCR experiments. This yielded 35 data pairs (qPCR:microarray, 5 treatment values excluding freshwater for each of 7 genes), which had an overall Pearson’s correlation of 0.83 ( $p < 1.08e-09$ ) indicating the gene expression patterns observed in the microarray experiment were recapitulated in the qPCR studies.
